# Supplementary material
Source: Springer Nature journal article supplement (https://www.springermedizin.de/resource/supplementary/12884_2013_788_MOESM1_ESM.pdf/9458196)
Supplement: MOESM1 [file 9458196]

- General knowledge about diabetes (prevention, risk factors)
  - Diabetes risk perception
- Health beliefs about health behaviors relating to diabetes

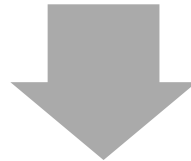

Health Belief Model

Prenatal behavioral intentions

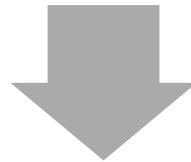

Self-efficacy

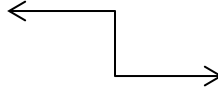

Social support

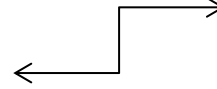

Postpartum health behaviors after GDM (dietary habits, physical activity)
